# Supplementary material for: Sex-specific aspects of endogenous retroviral insertion and deletion
Source: PubMed Central journal article supplement (PMC3827010; doi:10.1186/1471-2148-13-243), 2013-11-07
Supplement: 1471-2148-13-243-S1.pdf [file 1471-2148-13-243-S1.pdf]

## Additional file 1 — equations

In general,

$$\dot{n}_i = a + bn_i \implies n_i = \frac{e^{bt}[a + bn_i(0)] - a}{b}$$

so that

$$\frac{n_i}{n_j} = \frac{b_j}{b_i} \frac{e^{b_i t}[a_i + b_i n_i(0)] - a_i}{e^{b_j t}[a_j + b_j n_j(0)] - a_j}$$

and when  $b_i < 0$  and  $b_j < 0$  and  $a_j \neq 0$

$$\lim_{t \rightarrow \infty} \frac{n_i}{n_j} = \frac{b_j}{b_i} \frac{a_i}{a_j}. \quad (1)$$

In the case of the mammals we let  $a_i = \frac{1}{3}m + \frac{2}{3}f$  and  $a_j = \frac{1}{2}m + \frac{1}{2}f$  in Equation 1 while in the case of birds we let  $a_i = \frac{2}{3}m + \frac{1}{3}f$ . For recombination linked deletion we substitute  $b_i = \frac{2}{3}b_j$  otherwise we substitute  $b_i = b_j$ .
