# Supplementary material for: Sex-specific aspects of endogenous retroviral insertion and deletion
Source: PubMed Central journal article supplement (PMC3827010; doi:10.1186/1471-2148-13-243), 2013-11-07
Supplement: 1471-2148-13-243-S2.pdf [file 1471-2148-13-243-S2.pdf]

## Additional file 2: filtering

|         | autosome  |          | X     |          | autosome retained | X retained | overall retained |      |
|---------|-----------|----------|-------|----------|-------------------|------------|------------------|------|
|         | total     | filtered | total | filtered |                   |            |                  |      |
| mammals | human     | 1630     | 0     | 139      | 0                 | 100%       | 100%             | 100% |
|         | chimp     | 1050     | 383   | 74       | 26                | 64%        | 65%              | 64%  |
|         | gorilla   | 922      | 621   | 83       | 46                | 33%        | 45%              | 34%  |
|         | orangutan | 1135     | 745   | 93       | 68                | 34%        | 27%              | 34%  |
|         | macaque   | 1011     | 395   | 90       | 33                | 61%        | 63%              | 61%  |
|         | marmoset  | 516      | 224   | 32       | 19                | 57%        | 41%              | 56%  |
|         | mouse     | 3264     | 3     | 310      | 1                 | 100%       | 100%             | 100% |
|         | rat       | 1092     | 297   | 124      | 36                | 73%        | 71%              | 73%  |
|         | rabbit    | 399      | 62    | 40       | 8                 | 84%        | 80%              | 84%  |
|         | dog       | 160      | 11    | 17       | 0                 | 93%        | 100%             | 94%  |
|         | cat       | 263      | 97    | 27       | 11                | 63%        | 59%              | 63%  |
|         | horse     | 150      | 13    | 21       | 0                 | 91%        | 100%             | 92%  |
|         | pig       | 198      | 33    | 36       | 4                 | 83%        | 89%              | 84%  |
|         | cow       | 820      | 101   | 114      | 24                | 88%        | 79%              | 87%  |
|         | opossum   | 2375     | 189   | 31       | 1                 | 92%        | 97%              | 92%  |

  

|       | autosome    |          | Z     |          | autosome retained | Z retained | overall retained |     |
|-------|-------------|----------|-------|----------|-------------------|------------|------------------|-----|
|       | total       | filtered | total | filtered |                   |            |                  |     |
| birds | turkey      | 52       | 31    | 4        | 4                 | 40%        | 0%               | 38% |
|       | chicken     | 124      | 64    | 24       | 20                | 48%        | 17%              | 43% |
|       | zebra finch | 162      | 104   | 79       | 47                | 36%        | 41%              | 37% |

Table 1: Full-length proviruses that are found and filtered based on unknown nucleotide sequence (sequence recorded with Ns). For autosome and allosome (X or Z) and for mammals and birds, the table contains the following columns: total (total number of full-length proviruses found); filtered (number of proviruses with more than five consecutive unknown nucleotides or comprising more than five percent unknown nucleotides overall). The table also shows totals retained as percentages.

|         | autosome  |           | X     |           | autosome retained | X retained | overall retained |     |
|---------|-----------|-----------|-------|-----------|-------------------|------------|------------------|-----|
|         | total     | annotated | total | annotated |                   |            |                  |     |
| mammals | human     | 1630      | 1135  | 139       | 83                | 70%        | 60%              | 69% |
|         | chimp     | 1050      | 587   | 74        | 39                | 56%        | 53%              | 56% |
|         | gorilla   | 922       | 477   | 83        | 33                | 52%        | 40%              | 51% |
|         | orangutan | 1135      | 530   | 93        | 36                | 47%        | 39%              | 46% |
|         | macaque   | 1011      | 652   | 90        | 55                | 64%        | 61%              | 64% |
|         | marmoset  | 516       | 263   | 32        | 14                | 51%        | 44%              | 51% |
|         | mouse     | 3264      | 2164  | 310       | 209               | 66%        | 67%              | 66% |
|         | rat       | 1092      | 620   | 124       | 75                | 57%        | 60%              | 57% |
|         | rabbit    | 399       | 157   | 40        | 18                | 39%        | 45%              | 40% |
|         | dog       | 160       | 53    | 17        | 9                 | 33%        | 53%              | 35% |
|         | cat       | 263       | 136   | 27        | 23                | 52%        | 85%              | 55% |
|         | horse     | 150       | 81    | 21        | 10                | 54%        | 48%              | 53% |
|         | pig       | 198       | 119   | 36        | 27                | 60%        | 75%              | 62% |
|         | cow       | 820       | 451   | 114       | 70                | 55%        | 61%              | 56% |
|         | opossum   | 2375      | 795   | 31        | 13                | 33%        | 42%              | 34% |

  

|       | autosome    |           | Z     |           | autosome retained | Z retained | overall retained |     |
|-------|-------------|-----------|-------|-----------|-------------------|------------|------------------|-----|
|       | total       | annotated | total | annotated |                   |            |                  |     |
| birds | turkey      | 52        | 9     | 4         | 1                 | 17%        | 25%              | 18% |
|       | chicken     | 124       | 30    | 24        | 4                 | 24%        | 17%              | 23% |
|       | zebra finch | 162       | 72    | 79        | 45                | 44%        | 57%              | 49% |

Table 2: Full-length proviruses that are found and annotated as containing retroviral genes by LTRdigest. For autosome and allosome (X or Z) and for mammals and birds, the table contains the following columns: total (total number of full-length proviruses found); annotated (total number of proviruses with at least one viral gene beyond *pol*). The table also shows totals retained as percentages.
