# Supplementary material for: Sex-specific aspects of endogenous retroviral insertion and deletion
Source: PubMed Central journal article supplement (PMC3827010; doi:10.1186/1471-2148-13-243), 2013-11-07
Supplement: 1471-2148-13-243-S4.pdf [file 1471-2148-13-243-S4.pdf]

## Additional file 4 — GC content

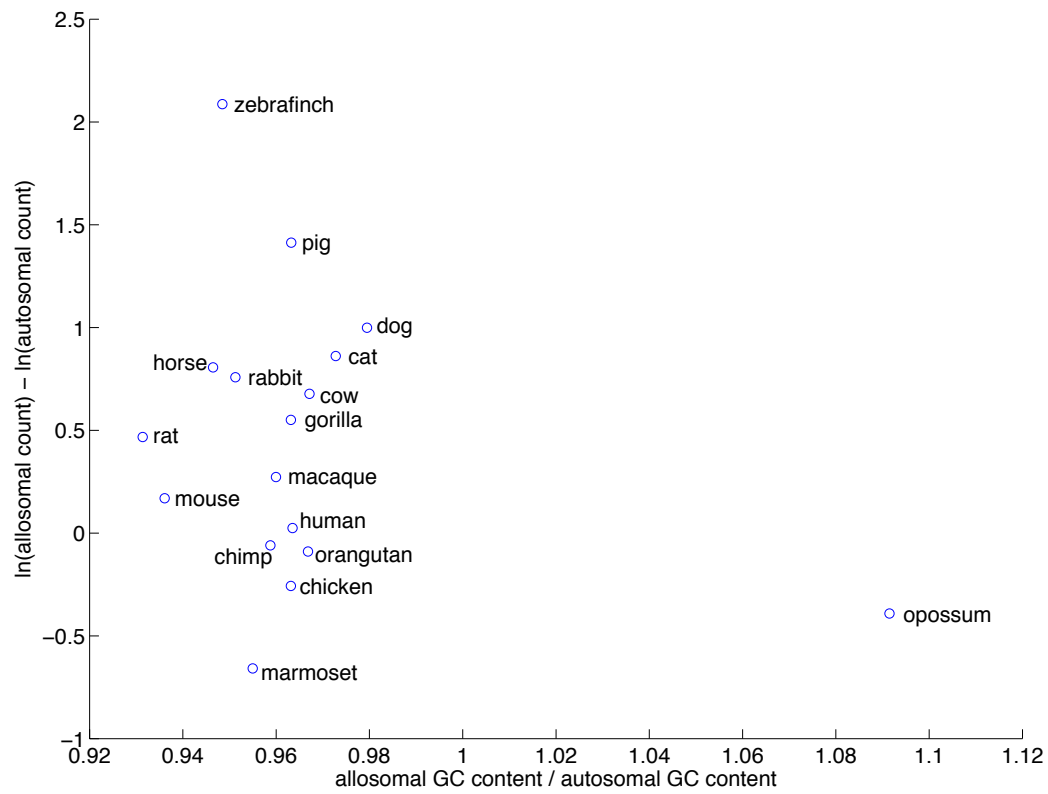

Figure 1: The ratio of allosomal (X or Z) to autosomal full-length proviruses ( $p$ ) is not correlated with the ratio of allosomal to autosomal GC content.

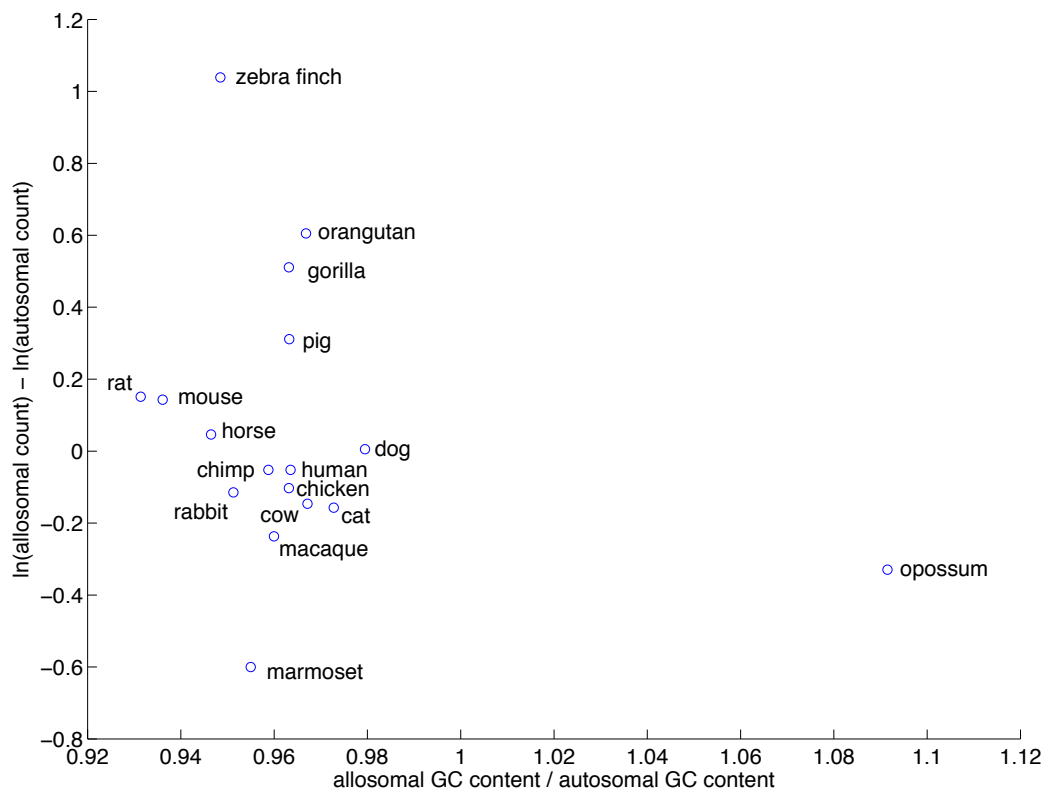

Figure 2: The ratio of allosomal (X or Z) to autosomal solo-LTRs is not correlated with the ratio of allosomal to autosomal GC content.
