# Supplementary material for: Sex-specific aspects of endogenous retroviral insertion and deletion
Source: PubMed Central journal article supplement (PMC3827010; doi:10.1186/1471-2148-13-243), 2013-11-07
Supplement: 1471-2148-13-243-S5.pdf [file 1471-2148-13-243-S5.pdf]

## Additional file 5 — point estimates and intervals

### Mammal solo-LTRs and full-length proviruses under non recombination linked deletion.

Let  $b_x = l_x - g_x$ ,  $b_a = l_a - g_a$  and  $n = n_x + n_a$  then

$$\text{expected } n_x = \frac{2(2 + \beta)b_x n}{3(1 + \beta)b_a + 2(2 + \beta)b_x}$$

and

$$\beta = \frac{3b_a x + 4b_x(x - n)}{2b_x(n - x) - 3b_a x}.$$

### Mammal full-length proviruses under recombination linked deletion.

Let  $b_x = l_x - g_x$ ,  $b_a = l_a - g_a$  and  $n = n_x + n_a$  then

$$\text{expected } n_x = \frac{(2 + \beta)b_x n}{(1 + \beta)b_a + (2 + \beta)b_x}$$

and

$$\beta = \frac{b_a x + 2b_x(x - n)}{b_x n - (b_a + b_x)x}.$$

### Bird solo-LTRs and full-length proviruses under non recombination linked deletion.

Let  $b_z = l_z - g_z$ ,  $b_a = l_a - g_a$  and  $n = n_z + n_a$  then

$$\text{expected } n_z = \frac{2(1 + 2\beta)b_z n}{3(1 + \beta)b_a + 2b_z + 4\beta b_z}$$

and

$$\beta = \frac{3b_a z + 2b_z(z - n)}{4b_z(n - z) - 3b_a z}.$$

### Bird full-length proviruses under recombination linked deletion.

Let  $b_z = l_z - g_z$ ,  $b_a = l_a - g_a$  and  $n = n_z + n_a$  then

$$\text{expected } n_z = \frac{(1 + 2\beta)b_z n}{b_a + \beta b_a + b_z + 2\beta b_z}$$

and

$$\beta = \frac{(b_a + b_z)z - b_z n}{2b_z n - (b_a + 2b_z)z}.$$

### Calculating intervals for $\beta$ .

As expected  $n_a = n - \text{expected } n_x$  (or expected  $n_z$  as appropriate) we can calculate a  $\chi^2$  value for our observations as a function of  $\beta$ . By finding the positive roots of  $\chi^2(\beta) - 3.841$  (where 3.841 is the critical  $\chi^2$  value associated with a p-value of 0.05 under a 1 d.o.f. goodness of fit) we can identify the interval of  $\beta$  outside of which our observed ratios would be unlikely to occur due to chance.
